# Supplementary material
Source: PubMed Central journal article supplement (PMC2707212)

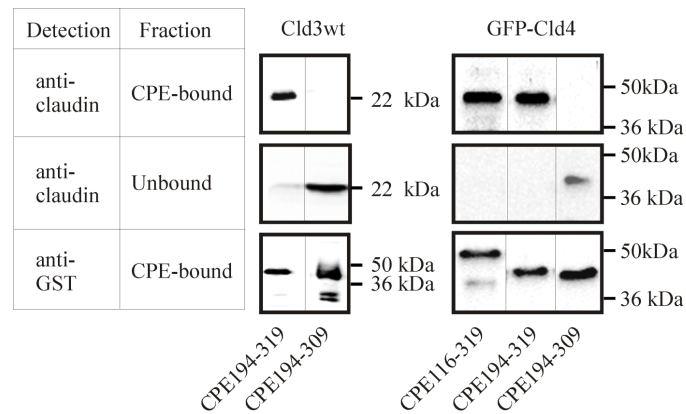

Sup. Fig 1. Deletion of the last 10 C-terminal amino acids diminishes the binding of GST-CPE to full length Cld3 and Cld4. HEK cells were transfected with Cld3wt (left) or GFP-Cld4 (right). Lysates thereof were used for pull down assays with GST-CPE<sub>116-319</sub>, GST-CPE<sub>194-319</sub> or GST-CPE<sub>194-309</sub>. Bound and unbound fractions were analyzed by SDS-PAGE and Western blot. Representative blots are shown. For GST-CPE<sub>194-319</sub>, Cld3wt was found in the CPE-bound fraction but was barely detectable in the unbound fraction. In contrast, for GST-CPE<sub>194-309</sub> Cld3wt was barely detectable in the CPE-bound fraction but found in the unbound fraction. Similar, GFP-Cld4 was found in the CPE-bound fraction for GST-CPE<sub>116-319</sub> and GST-CPE<sub>194-319</sub> but in the unbound fraction for GST-CPE<sub>194-309</sub>. The amounts of the different GST-CPE constructs found in the CPE-bound fractions were similar.

Sup. Fig 2: Binding of CPE<sub>116-319</sub> to Cld5<sub>wt</sub> and strong reduction of this binding by the substitutions T151A and Q156E but not Q156A and F147A detected by immunostaining. HEK293 cells were transfected with Cld5<sub>wt</sub>-YFP or Cld5<sub>mutant</sub>-YFP. Three days after transfection cells were incubated with 10 µg/ml GST-CPE<sub>116-319</sub> (1h, 37°C), washed with PBS and fixed. GST-CPE<sub>116-319</sub> (red) was detected by anti-GST antibodies, nuclei (blue) were stained with DAPI, Cld5 was detected by YFP-fluorescence. GST-CPE<sub>116-319</sub> bound to cells expressing Cld5<sub>wt</sub>-YFP as well as to cells expressing Cld5<sub>Q156A</sub>-YFP and Cld5<sub>F147A</sub>-YFP that localize to the plasma membrane similar as Cld5<sub>wt</sub> (21). However, non-expressing cells as well as cells that express Cld5<sub>K157A</sub>-YFP, which is strongly affected in plasma membrane targeting, did not bind GST-CPE<sub>116-319</sub>. Moreover, substitutions T151A and Q156E, that did not affect the plasma membrane targeting of Cld5 (21), diminished the binding of GST-CPE<sub>116-319</sub>. Bar= 10 µm.

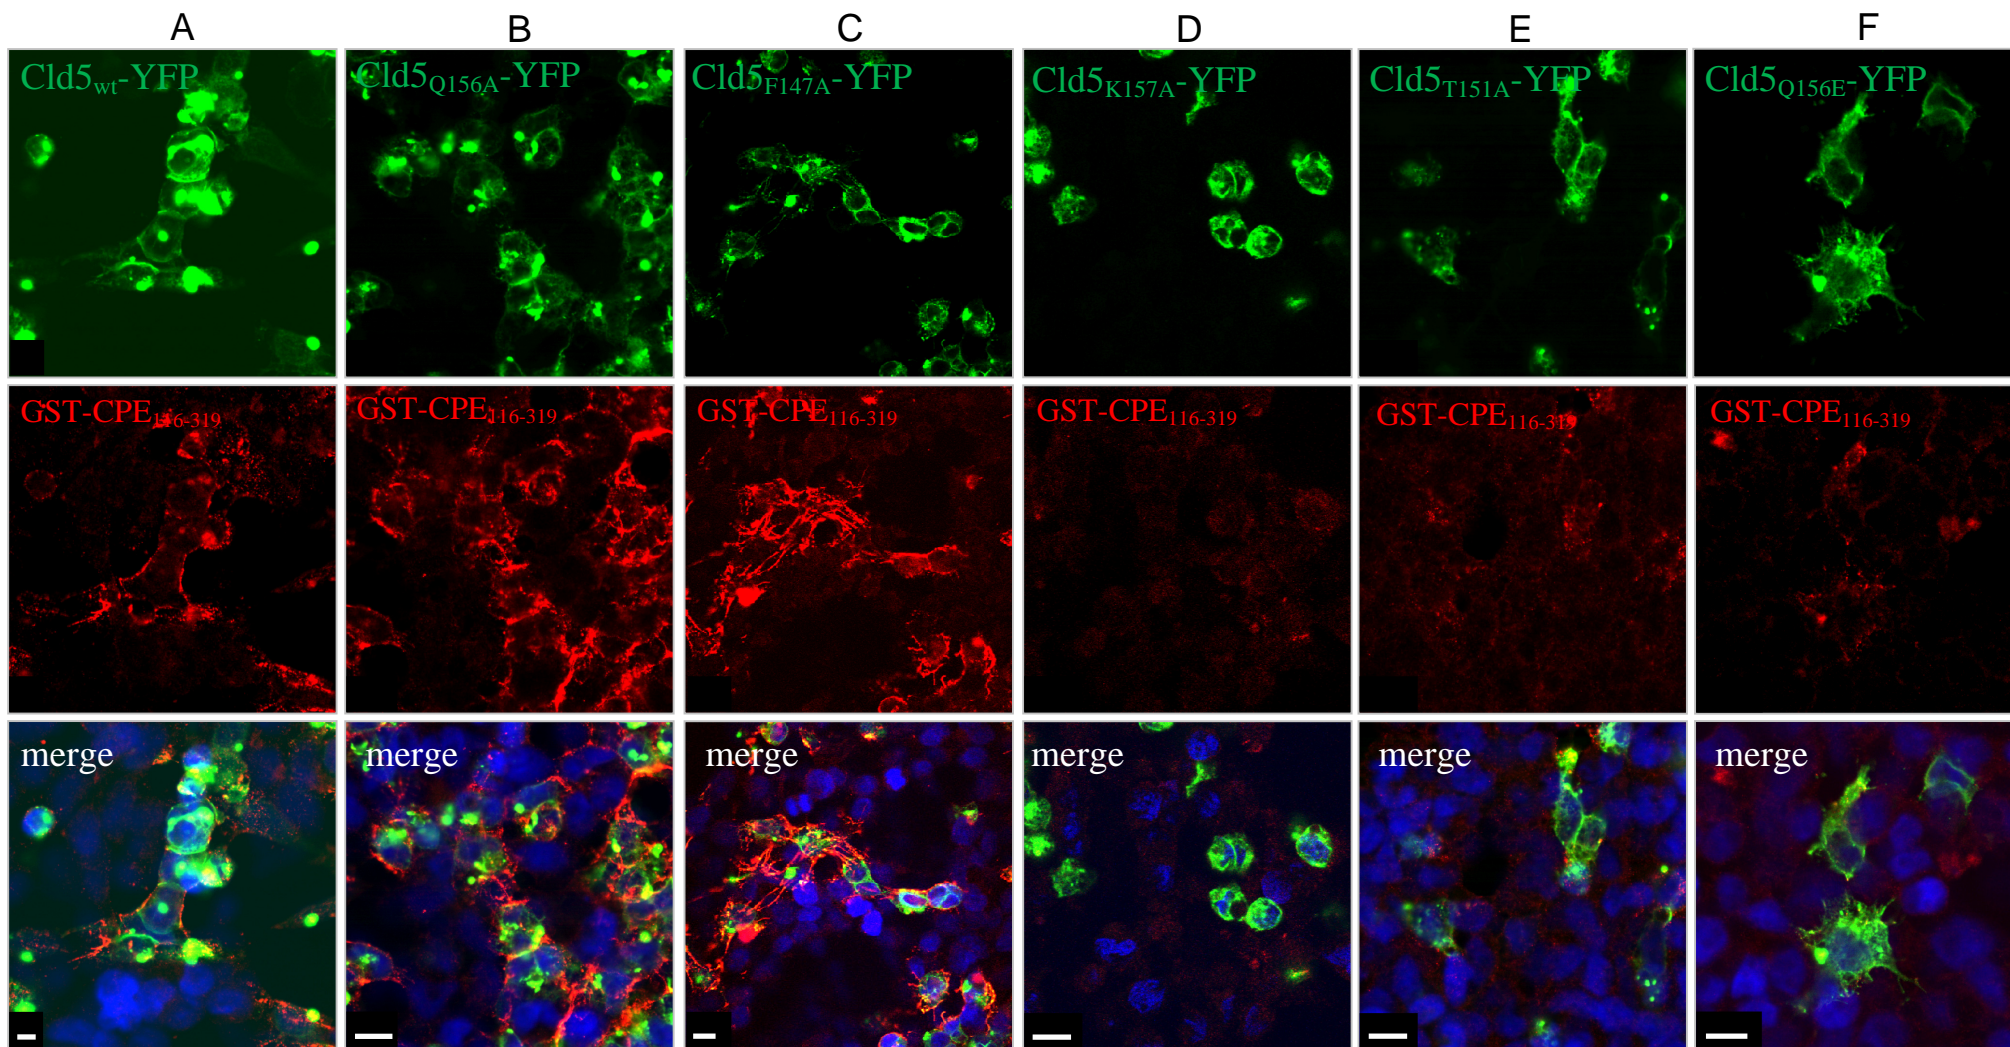

Supplement: supp_M109.008623_jbc.M109.008623-1.pdf [file supp_M109.008623_jbc.M109.008623-1.pdf]
